# Supplementary material for: Productivity Convergence for the Capable? Endogenous Capabilities, the Great Recession, and the Effectiveness of EU Cohesion Policy
Source: Research Square preprint supplement (doi:10.21203/rs.3.rs-7753073/v1), 2025-11-01
Supplement: Supplementary file 1 [file f4bd5127f4cc2ea5cefa39c3.docx]

**Appendix**

**Section 1**. Socio-Institutional Factors in EU Cohesion.

In this appendix section, we illustrate how the SIFs indicators are computed. Recalling equations [5] and [6]:

[5]

[6]

With and , equation [10] could be rewritten as:

[10]

Considering and as the regional fixed effects estimated from the following models [a1] and [a2], in a model with :

[a1]

[a2]

We can rearrange [a1] and [a2], defining the terms + and as follows:

[a3]

[a4]

Under the condition of residual similarity (, from equations [a3] and [a4], we can define:

[a5]

[a6]

Thus, the ratio between [a6] and [a5] can be rewritten as follows:

[a7]

Indicating the variation in productivity growth rates between the hypothesis that SFs variables are and are not included in the model, weighted by the variation of the socio-institutional factors that favour the convergence between the same two models [a3] and [a4].

**Section 2. Descriptive statistics**

**Table 1A.** *Descriptive statistics of the estimation sample*

| **Variable** | | **Mean** | **Std. dev.** | **Min** | **Max** |
| --- | --- | --- | --- | --- | --- |
|  |
|  |  |  |  |  |  |  |
| Productivity Growth Rates | overall | 0.0008694 | 0.0277435 | -0.1923179 | 0.2314054 |  |
|  | between |  | 0.0123305 | -0.0315677 | 0.0653495 |  |
|  | within |  | 0.0248403 | -0.2050265 | 0.2250342 |  |
|  |  |  |  |  |  |  |
| Productivity | overall | -0.174046 | 0.5399165 | -2.093977 | 1.025546 |  |
|  | between |  | 0.5340921 | -1.942059 | 0.7632087 |  |
|  | within |  | 0.0733687 | -0.8643566 | 0.4286872 |  |
|  |  |  |  |  |  |  |
| Structural Funds per unit of GDP | overall | -0.231011 | 1.550197 | -5.092587 | 3.503421 |  |
|  | between |  | 1.42007 | -3.516013 | 2.843077 |  |
|  | within |  | 0.6320221 | -5.2918 | 1.4471 |  |
|  |  |  |  |  |  |  |
| Score Structural Funds | overall | 0.0320611 | 0.1204931 | -0.7499397 | 0.9509125 |  |
|  | between |  | 0.0436999 | -0.0154775 | 0.1759851 |  |
|  | within |  | 0.1122379 | -0.8307254 | 0.8638301 |  |
|  |  |  |  |  |  |  |
| Specialization in K-N sectors | overall | -0.0670119 | 0.0971653 | -0.4369504 | 0.3234547 |  |
|  | between |  | 0.0960274 | -0.3741216 | 0.3096677 |  |
|  | within |  | 0.0211741 | -0.2482492 | 0.0559043 |  |
|  |  |  |  |  |  |  |
| Educational attainment in 5-8 levels | overall | -5.616886 | 0.3662287 | -7.046728 | -4.619664 |  |
|  | between |  | 0.3529423 | -6.502439 | -4.816081 |  |
|  | within |  | 0.1055138 | -6.403612 | -5.058068 |  |
|  |  |  |  |  |  |  |
| Employment rate | overall | -0.0164635 | 0.16507 | -0.5139435 | 1.231044 |  |
|  | between |  | 0.1673567 | -0.4150721 | 1.180336 |  |
|  | within |  | 0.0399848 | -0.2409766 | 0.2049085 |  |
|  |  |  |  |  |  |  |
| GFCF per unit of GDP | overall | 0.0029774 | 0.2331857 | -1.123721 | 1.585495 |  |
|  | between |  | 0.1914848 | -0.5425164 | 0.7423493 |  |
|  | within |  | 0.1363724 | -0.6988294 | 0.8625709 |  |
| Variables are in logarithms. Source: authors’ elaboration. | | | | | | |

| **Variables** | *Dependent variable: Productivity Growth* | | | | | | | | |
| --- | --- | --- | --- | --- | --- | --- | --- | --- | --- |
| **General** | **Pre-crisis** | **Post-crisis** | **Low KV** | **Low KV**  **Pre-crisis** | **Low KV**  **Post-crisis** | **High KV** | **High KV**  **Pre-crisis** | **High KV**  **Post-crisis** |
|  |  |  |  |  |  |  |  |  |  |
| Productivity | .0063822 | **.0296953***** | **.0406246***** | **.0264079***** | .0104895 | **.0340339***** | -.00133 | **.0344169***** | .0032171 |
|  | (.00397) | (.010552) | (.008518) | (.0029892) | (.0107405) | (.006475) | (.006091) | (.0130127) | (.0186739) |
| Structural Funds per unit of GDP | 2.74e-06 | **-.0004778**** | **-.0005455*** | -.0001189 | -.0001083 | **-.0007956*** | 8.15e-06 | **-.000686**** | -.0000368 |
|  | (.000043) | (.0002065) | (.000284) | (.0001979) | (.0001332) | (.0004348) | (.0000404) | (.0002879) | (.0002154) |
| Score Structural Funds | -.0009442 | -.002628** | -.0004916 | -.0019992 | -.0009993 | -.0020723 | .0001863 | -.00277** | .0000328 |
|  | (.0006261) | (.0011737) | (.0008776) | (.0015979) | (.0011349) | (.0017566) | (.0008561) | (.0014098) | (.0002017) |
| Specialization in K-N sectors (no lag) | .0073859 | .0193893** | .0570296*** | .018522*** | .0151412 | .0377847*** | -.0019793 | .0097831 | .0055812 |
|  | (.0046309) | (.0082482) | (.0126729) | (.0064574) | (.0154758) | (.0134345) | (.009066) | (.0088501) | (.032419) |
| Educational Attainment in 5-8 levels | .0006037 | .0009367 | -.0006273 | -.0002735 | .0002758 | -.0048116* | -.0001804 | .0016617 | .0000499 |
|  | (.0004659) | (.0010772) | (.0014979) | (.0013785) | (.0007063) | (.0025893) | (.0008332) | (.0015193) | (.0003246) |
| Employment rate | -.0066594 | -.0172687** | -.0426999*** | -.0376954*** | -.0069964 | -.0685674*** | .0005463 | -.0155634* | -.0024426 |
|  | (.0042477) | (.0071318) | (.0097001) | (.0048839) | (.0073241) | (.0130767) | (.0024986) | (.0081593) | (.0142045) |
| Gross Fixed Capital Formation (t-2) | .000454 | -.0003116 | .0013208 | .0002941 | .0000162 | .0053313*** | .0000464 | .00055 | .0000521 |
|  | (.0003401) | (.0009464) | (.0008972) | (.0009848) | (.0005619) | (.0017285) | (.0002175) | (.0013666) | (.0003125) |
|  |  |  |  |  |  |  |  |  |  |
| Observations | 5,418 | 2,064 | 2,064 | 2,709 | 1,032 | 1,032 | 2,709 | 1,032 | 1,032 |
| Number of groups | 258 | 258 | 258 | 129 | 129 | 129 | 129 | 129 | 129 |
| DVvar | Contiguity | Contiguity | Contiguity | Contiguity | Contiguity | Contiguity | Contiguity | Contiguity | Contiguity |
| Errorlag | Contiguity | Contiguity | Contiguity | Contiguity | Contiguity | Contiguity | Contiguity | Contiguity | Contiguity |
| Regions FE | Yes | Yes | Yes | Yes | Yes | Yes | Yes | Yes | Yes |
| Robust standard errors in parentheses. Variables are in logarithms and lagged by one year. Source: authors’ elaboration. | | | | | | | | | |
| *** p<0.01, ** p<0.05, * p<0.1 | | | | | | | | | |

**Section 3. Spatial regression: SAR (indirect effects) and SEM**

**Table 3A.** *Convergence, Structural Funds and regional capabilities, spatial regression (Spatial Autoregressive Model) across EU regions. Indirect Effects.*

**Table 3B.** *Convergence, Structural Funds and regional capabilities, spatial regression (Spatial Error Models) across EU regions.*

| VARIABLES | *Dependent variable: Productivity Growth* | | | |
| --- | --- | --- | --- | --- |
| **General** | **Low KV**  **Pre-crisis** | **High KV** | **High KV**  **Post-crisis** |
|  |  |  |  |  |
| Productivity | **-0.0890***** | **-0.159***** | **-0.0995***** | **-0.221***** |
|  | (0.00535) | (0.0176) | (0.00812) | (0.0202) |
| Structural Funds per unit of GDP | 5.12e-05 | 0.00190 | 0.000582 | 0.00254 |
|  | (0.000586) | (0.00143) | (0.000804) | (0.00184) |
| Score Structural Funds | 0.0131*** | 0.0162* | 0.0139*** | -0.00229 |
|  | (0.00303) | (0.00947) | (0.00377) | (0.00520) |
| Specialization in K-N sectors (no lag) | -0.105*** | -0.232*** | -0.148*** | -0.384*** |
|  | (0.0156) | (0.0431) | (0.0233) | (0.0449) |
| Educational Attainment in 5-8 levels | -0.00812** | -0.00468 | -0.0134*** | -0.00341 |
|  | (0.00359) | (0.00998) | (0.00496) | (0.00979) |
| Employment rate | 0.0911*** | 0.106*** | 0.0410*** | 0.168*** |
|  | (0.00934) | (0.0272) | (0.0137) | (0.0320) |
| Gross Fixed Capital Formation (t-2) | -0.00631** | -0.000685 | 0.00349 | -0.00360 |
|  | (0.00266) | (0.00850) | (0.00388) | (0.00573) |
| Spatial Autocorrelation Error | 0.510*** | 0.595*** | 0.440*** | 0.408*** |
|  | (0.0209) | (0.0520) | (0.0382) | (0.0656) |
| Constant | 0.0213*** | 0.0193*** | 0.0237*** | 0.0185*** |
|  | (0.000213) | (0.000463) | (0.000333) | (0.000440) |
|  |  |  |  |  |
| Observations | 5,418 | 1,032 | 2,709 | 1,032 |
| Number of groups | 258 | 129 | 129 | 129 |
| Errorlag | Contiguity | Contiguity | Contiguity | Contiguity |
| Regions FE | Yes | Yes | Yes | Yes |
| Robust standard errors in parentheses. Variables are in logarithms and lagged by one year. Source: authors’ elaboration. | | | | |
| *** p<0.01, ** p<0.05, * p<0.1 | | | | |

**Section 4.** Robustness checks

In this section, we test the robustness of our results. In the first stage we check for potential multicollinearity, as in the following Table 4A. Variance Inflation Factor results reveal that Educational Attainment Rate (5-8) has a score higher than 10, the benchmark to evaluate multicollinearity.

**Table 4A.** Variance Inflation Factor

| **Variable** | **General** | **Before crisis** | **After Crisis** | **Low KV** | **Low-KV Before crisis** | **Low-KV After crisis** | **High KV** | **High-KV before crisis** | **High-KV after crisis** |
| --- | --- | --- | --- | --- | --- | --- | --- | --- | --- |
| Productivity | 1.95 | 1.42 | 4.52 | 1.84 | 1.51 | 4.93 | 2.12 | 1.4 | 4.91 |
| Structural Funds per unit of GDP | 2.16 | 1.75 | 4.7 | 2.45 | 2 | 6.61 | 2.06 | 1.59 | 4.45 |
| Score FS | 1.25 | 1.37 | 1.18 | 1.28 | 1.37 | 1.23 | 1.27 | 1.48 | 1.19 |
| ISP K-N | 2.06 | 2.05 | 2.04 | 1.6 | 1.67 | 1.54 | 2.72 | 2.85 | 2.8 |
| Educational Attainment Rate (5-8) | **21.64** | 9.99 | 9.61 | **18.36** | 9.07 | 9.5 | **26.16** | **11.72** | **10.69** |
| Employment Rate | 1.44 | 1.45 | 1.57 | 1.68 | 1.75 | 2.22 | 1.36 | 1.34 | 1.45 |
| GFCF per GDP | 1.07 | 1.11 | 1.05 | 1.15 | 1.23 | 1.13 | 1.09 | 1.08 | 1.13 |
| 2002 | 1.95 | 1.99 |  | 1.94 | 1.96 |  | 1.98 | 2.04 |  |
| 2003 | 1.96 | 2 |  | 1.94 | 1.97 |  | 1.99 | 2.05 |  |
| 2004 | 1.96 | 1.99 |  | 1.93 | 1.96 |  | 1.99 | 2.03 |  |
| 2005 | 1.97 | 2.01 |  | 1.93 | 1.96 |  | 2.02 | 2.07 |  |
| 2006 | 1.98 | 2.02 |  | 1.9 | 1.94 |  | 2.08 | 2.14 |  |
| 2007 | 1.98 | 2.03 |  | 1.87 | 1.9 |  | 2.12 | 2.19 |  |
| 2008 | 1.99 | 2.05 |  | 1.86 | 1.9 |  | 2.15 | 2.26 |  |
| 2009 | 2 |  |  | 1.92 |  |  | 2.1 |  |  |
| 2010 | 1.97 |  |  | 1.89 |  |  | 2.09 |  |  |
| 2011 | 2 |  |  | 1.87 |  |  | 2.16 |  |  |
| 2012 | 1.99 |  |  | 1.87 |  |  | 2.13 |  |  |
| 2013 | 1.97 |  | 1.99 | 1.86 |  | 1.98 | 2.11 |  | 2 |
| 2014 | 1.97 |  | 1.98 | 1.82 |  | 1.93 | 2.16 |  | 2.03 |
| 2015 | 1.97 |  | 1.98 | 1.81 |  | 1.92 | 2.18 |  | 2.05 |
| 2016 | 1.96 |  | 1.98 | 1.8 |  | 1.92 | 2.16 |  | 2.04 |
| 2017 | 1.95 |  | 2.01 | 1.78 |  | 1.92 | 2.17 |  | 2.1 |
| 2018 | 1.97 |  | 1.97 | 1.78 |  | 1.89 | 2.22 |  | 2.07 |
| 2019 | 1.97 |  | 1.98 | 1.76 |  | 1.87 | 2.22 |  | 2.09 |
| **Mean VIF** | 2.68 | 2.37 | 2.75 | 2.48 | 2.30 | 2.90 | 2.99 | 2.59 | 2.93 |

Then, we exclude the Educational Attainment Rate (5-8) from the sample in which we detect multicollinearity issues. In the following Table 4B, we show the coefficients of models including this variable, and model excluding the same. Specifically, the exclusion of Educational Attainment Rate (5-8) does not lead to make a consistent bias in our estimated coefficients.

**Table 4B.** Estimates results excluding the variable Educational Attainment Rate (5-8)

| **Variables** | Dependent variable: Productivity Growth Rates | | | | | | | | | |
| --- | --- | --- | --- | --- | --- | --- | --- | --- | --- | --- |
| **General** | **General** | **Low VK** | **Low VK** | **High VK** | **High VK** | **High VK Before crisis** | **High VK Before crisis** | **High VK After crisis** | **High VK**  **After crisis** |
| Productivity | **-0.0701***** | **-0.0719***** | **-0.105***** | **-0.108***** | **-0.101***** | **-0.102***** | **-0.278***** | **-0.279***** | **-0.224***** | **-0.222***** |
|  | (0.0124) | (0.0125) | (0.0159) | (0.0164) | (0.0146) | (0.0147) | (0.0396) | (0.0389) | (0.0488) | (0.0487) |
| Structural Funds per unit of GDP | -0.000877 | -0.00103 | -0.000326 | 0.000410 | 0.000797 | 0.000490 | **0.00815***** | **0.00842***** | 0.00243 | 0.00270 |
|  | (0.000874) | (0.000826) | (0.00132) | (0.00128) | (0.00107) | (0.000928) | (0.00151) | (0.00149) | (0.00183) | (0.00181) |
| Score FS | 0.00769*** | 0.00848*** | 0.00670 | 0.00538 | 0.00727** | 0.00816*** | 0.0200*** | 0.0199*** | -0.00172 | -0.00114 |
|  | (0.00272) | (0.00269) | (0.00719) | (0.00734) | (0.00316) | (0.00310) | (0.00733) | (0.00729) | (0.00514) | (0.00510) |
| ISP K-N | -0.147*** | -0.143*** | -0.0879** | -0.0843** | -0.209*** | -0.209*** | -0.145 | -0.149 | -0.362*** | -0.358*** |
|  | (0.0315) | (0.0311) | (0.0425) | (0.0414) | (0.0432) | (0.0424) | (0.0929) | (0.0918) | (0.0750) | (0.0742) |
| Educational Attainment Rate (5-8) | -0.00949** |  | 0.0109* |  | -0.0147* |  | -0.0109 |  | -0.00296 |  |
|  | (0.00458) |  | (0.00635) |  | (0.00751) |  | (0.0118) |  | (0.00758) |  |
| Employment Rate | 0.0725*** | 0.0706*** | 0.103*** | 0.0944*** | 0.0384 | 0.0362 | 0.0682 | 0.0669 | 0.193*** | 0.196*** |
|  | (0.0201) | (0.0198) | (0.0305) | (0.0297) | (0.0235) | (0.0231) | (0.0516) | (0.0506) | (0.0406) | (0.0404) |
| GFCF per GDP | -0.00260 | -0.00155 | -0.0197** | -0.0185* | 0.00936 | 0.0115* | -0.0177 | -0.0173 | -0.00456 | -0.00465 |
|  | (0.00567) | (0.00551) | (0.00951) | (0.00941) | (0.00634) | (0.00606) | (0.0120) | (0.0119) | (0.00782) | (0.00779) |
| Constant | -0.0746*** | -0.0212*** | 0.0405 | -0.0195*** | -0.119*** | -0.0358*** | -0.124* | -0.0620*** | -0.0945** | -0.0756*** |
|  | (0.0263) | (0.00309) | (0.0358) | (0.00333) | (0.0439) | (0.00554) | (0.0710) | (0.0135) | (0.0450) | (0.0147) |
| Observations | 5,146 | 5,234 | 2,442 | 2,488 | 2,704 | 2,746 | 974 | 996 | 1,116 | 1,130 |
| R-squared | 0.084 | 0.083 | 0.149 | 0.146 | 0.107 | 0.105 | 0.191 | 0.190 | 0.206 | 0.205 |
| Number of groups | 264 | 264 | 150 | 151 | 244 | 245 | 135 | 137 | 148 | 150 |
| Regions Fixed Effects | YES | YES | YES | YES | YES | YES | YES | YES | YES | YES |
| Time Fixed Effects | YES | YES | YES | YES | YES | YES | YES | YES | YES | YES |
| Robust standard errors in parentheses. Variables are in logarithms and lagged by one year. Source: authors’ elaboration. | | | | | | | | | | |
| *** p<0.01, ** p<0.05, * p<0.1 | | | | | | | | | | |

To further address for potential bias, we estimates the same models by estimating only the convergence coefficient. Table 4C below reports our results.

**Table 4C**. Estimates results for convergence (productivity) parameter

| **Variables** | *Dependent variable: Productivity Growth Rates* | | | | | | | | |
| --- | --- | --- | --- | --- | --- | --- | --- | --- | --- |
| **General** | **Before crisis** | **After crisis** | **Low KV** | **Low KV**  **Before crisis** | **Low KV After crisis** | **High KV** | **High KV Before crisis** | **High KV**  **After crisis** |
| Productivity | **-0.0820***** | **-0.268***** | **-0.157***** | **-0.159***** | **-0.270***** | **-0.261***** | **-0.0784***** | **-0.305***** | **-0.184***** |
|  | (0.0193) | (0.0348) | (0.0329) | (0.0369) | (0.0510) | (0.0749) | (0.0136) | (0.0399) | (0.0471) |
| Constant | -0.00878** | -0.0444*** | -0.0267*** | -0.0234*** | -0.0444*** | -0.0285*** | 0.00159 | -0.0484*** | -0.0399*** |
|  | (0.00370) | (0.00546) | (0.00594) | (0.00394) | (0.00685) | (0.00867) | (0.00724) | (0.00870) | (0.0108) |
| Observations | 5,544 | 2,376 | 2,112 | 2,640 | 1,268 | 975 | 2,904 | 1,108 | 1,137 |
| R-squared | 0.061 | 0.209 | 0.071 | 0.166 | 0.262 | 0.122 | 0.069 | 0.201 | 0.100 |
| Number of groups | 264 | 264 | 264 | 153 | 152 | 131 | 264 | 137 | 150 |
| Regions Fixed Effects | YES | YES | YES | YES | YES | YES | YES | YES | YES |
| Time Fixed Effects | YES | YES | YES | YES | YES | YES | YES | YES | YES |
| Robust standard errors in parentheses. Variables are in logarithms and lagged by one year. Source: authors’ elaboration. | | | | | | | | | |
| *** p<0.01, ** p<0.05, * p<0.1 | | | | | | | | | |

In particular, the coefficients reported in Table 4C confirm our main results. In general, we find that convergence is stronger before the crisis, and that this process is driven particularly from regions with higher capabilities in self-sustain their productivity growth (high KV). Then, in the post-crisis period, regions with lower KV drive the convergence process, resulting in a higher coefficient associated to the productivity level at year t-1.

Although the primary objective of this paper is to examine the overall impact of the Structural Funds on regional productivity growth, we also test the robustness of our results by focusing exclusively on two of the four funds that comprise the Structural Funds. Specifically, we analyze the ERDF (European Regional Development Fund) and the ESF (European Social Fund), which together account for nearly 70% of total EU investment. As shown in Table 4D, the findings support the evidence of the crisis' impact on the effectiveness of Cohesion Policy, indicating a relative advantage for regions with lower KV scores compared to those with higher KV levels.

**Table 4D.** Robustness check with FESR and FSE.

| **Variables** | *Dependent variable: Productivity Growth Rates* | | | | | | | | |
| --- | --- | --- | --- | --- | --- | --- | --- | --- | --- |
| **General** | **Before crisis** | **After crisis** | **Low VK** | **Low VK**  **Before crisis** | **Low VK**  **After crisis** | **High KV** | **High KV**  **Before crisis** | **High KV**  **After crisis** |
| Productivity | **-0.0713***** | **-0.188***** | **-0.178***** | **-0.112***** | **-0.159***** | **-0.239***** | **-0.0980***** | **-0.276***** | **-0.225***** |
|  | (0.0129) | (0.0357) | (0.0348) | (0.0171) | (0.0494) | (0.0677) | (0.0146) | (0.0379) | (0.0484) |
| Structural Funds per unit of GDP (ERDF+FSE) | -0.000485 | **0.00452***** | 0.00130 | 0.00156 | 0.00127 | **0.00345**** | -4.38e-05 | **0.00811***** | 0.000326 |
|  | (0.000752) | (0.00141) | (0.00106) | (0.00104) | (0.00206) | (0.00135) | (0.000914) | (0.00157) | (0.00161) |
| Score FS | 0.00752*** | 0.0225*** | -0.00241 | 0.00620 | 0.0292*** | -0.00283 | 0.00744** | 0.0219*** | -0.00193 |
|  | (0.00272) | (0.00631) | (0.00436) | (0.00718) | (0.0104) | (0.00769) | (0.00314) | (0.00750) | (0.00507) |
| ISP K-N | -0.146*** | -0.119 | -0.306*** | -0.0809* | -0.227* | -0.193** | -0.211*** | -0.146 | -0.364*** |
|  | (0.0314) | (0.0761) | (0.0617) | (0.0420) | (0.117) | (0.0937) | (0.0433) | (0.0900) | (0.0752) |
| Educational Attainment Rate (5-8) | -0.00986** | -0.0164* | 0.0126** | 0.00760 | -0.0110 | 0.0214** | -0.0135* | -0.0140 | -0.00134 |
|  | (0.00460) | (0.00836) | (0.00607) | (0.00622) | (0.0106) | (0.00958) | (0.00732) | (0.0122) | (0.00745) |
| Employment Rate | 0.0726*** | 0.0868** | 0.207*** | 0.0995*** | 0.0925* | 0.184*** | 0.0399* | 0.0791 | 0.190*** |
|  | (0.0201) | (0.0365) | (0.0313) | (0.0310) | (0.0552) | (0.0556) | (0.0233) | (0.0496) | (0.0405) |
| GFCF per unit of GDP (t-2) | -0.00317 | -0.00145 | -0.00677 | -0.0206** | -0.00158 | -0.0148 | 0.00971 | -0.0146 | -0.00436 |
|  | (0.00585) | (0.00847) | (0.00630) | (0.0104) | (0.0112) | (0.0103) | (0.00627) | (0.0125) | (0.00785) |
| Constant | -0.0766*** | -0.130*** | 0.0225 | 0.0229 | -0.0948 | 0.0857 | -0.113*** | -0.142* | -0.0854* |
|  | (0.0265) | (0.0486) | (0.0369) | (0.0352) | (0.0614) | (0.0570) | (0.0429) | (0.0737) | (0.0446) |
| Observations | 5,155 | 2,064 | 2,082 | 2,442 | 1,090 | 959 | 2,713 | 974 | 1,123 |
| R-squared | 0.084 | 0.159 | 0.162 | 0.150 | 0.180 | 0.179 | 0.106 | 0.192 | 0.204 |
| Number of groups | 264 | 261 | 262 | 150 | 148 | 130 | 244 | 135 | 148 |
| Regions Fixed Effects | YES | YES | YES | YES | YES | YES | YES | YES | YES |
| Time Fixed Effects | YES | YES | YES | YES | YES | YES | YES | YES | YES |
| Robust standard errors in parentheses. Variables are in logarithms and lagged by one year. Source: authors’ elaboration. | | | | | | | | | |
| *** p<0.01, ** p<0.05, * p<0.1 | | | | | | | | | |

**Section 5.** Residuals similarity condition (SIF indicator)

The condition of similarity between residuals assumes that the residuals in equation [a2] and [a3] are similar, i.e., . The correlation between residuals and is illustrated in the following table 4.1:

**Table 4.1** Correlation between residuals (source: authors’ elaboration)

|  |  |  |
| --- | --- | --- |
|  | 1 |  |
|  | 0.9990 | 1 |

And representing their kernel density distributions, in figure 4.1, we confirm that the *residuals similarity condition* is met.

**Figure 4.1** Kernel Density Distribution of residuals (source: authors’ elaboration)

**
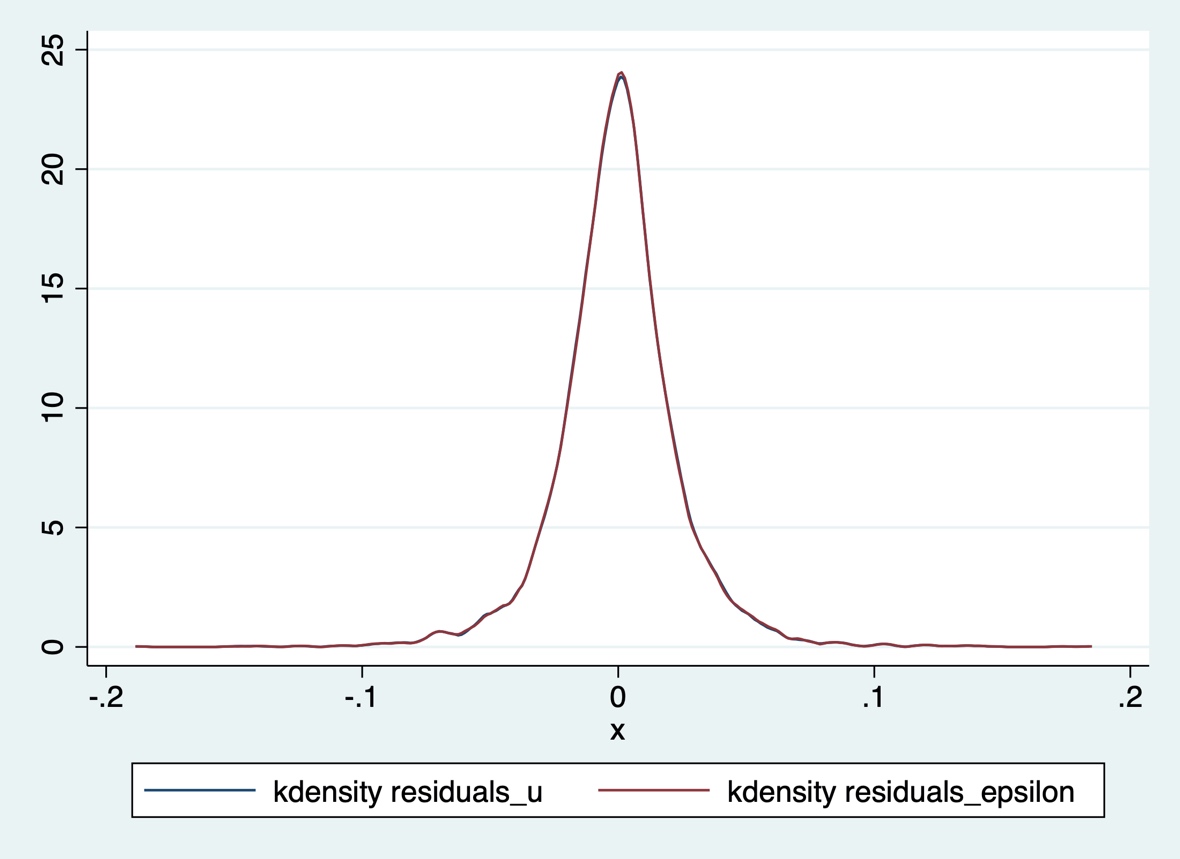
**
